# Supplementary material for: Clinical evaluation of Emblica Officinalis Gatertn (Amla) in healthy human subjects: Health benefits and safety results from a randomized, double-blind, crossover placebo-controlled study
Source: PubMed Central journal article supplement (PMC6926135; doi:10.1016/j.conctc.2019.100499), 2019-11-27
Supplement: mmc1.pdf [file mmc1.pdf]

**Kapoor et al. (Supplementary Information; Contemporary Clinical Trials Communications; j.conctc.2019.100499)**

**Table ST1.** Efficacy of amla on blood biochemical assessment and lipid profiles compared to placebo among the healthy human subjects.

| Parameters                 | Placebo intake (mean± sem)          |                                      |                                      |                                                   | Amla intake (mean± sem)             |                                      |                                      |                                                   | ANCOVA<br>(Among<br>Groups)                                              |
|----------------------------|-------------------------------------|--------------------------------------|--------------------------------------|---------------------------------------------------|-------------------------------------|--------------------------------------|--------------------------------------|---------------------------------------------------|--------------------------------------------------------------------------|
|                            | Before<br>(W1, W2) or<br>(W10, W11) | 2 Weeks<br>(W3, W4) or<br>(W12, W13) | 4 Weeks<br>(W5, W6) or<br>(W14, W15) | Post (3 Weeks)<br>( W7,W9,W9) or<br>(W16,W17,W18) | Before<br>(W1, W2) or<br>(W10, W11) | 2 Weeks<br>(W3, W4) or<br>(W12, W13) | 4 Weeks<br>(W5, W6) or<br>(W14, W15) | Post (3 Weeks)<br>( W7,W9,W9) or<br>(W16,W17,W18) |                                                                          |
| Glucose Fasting<br>(mg/dL) | 93.6± 3.06                          | 92.2± 2.20                           | 95.2 ± 2.45                          | 94.7 ± 3.67                                       | 92.5 ± 2.75                         | 93.8 ± 2.76                          | 95.7 ± 2.63                          | 95.3 ± 2.44                                       | 2W: F=1.61; P= 0.21<br>4W: F=0.41; P= 0.53<br>Post:: F=0.19; P= 0.67     |
| TG<br>(mg /dL)             | 183.0±17.8                          | 177.2±12.9                           | 175.8 ±19.0                          | 165.8±15.8                                        | 170.5± 12.3                         | 182.4± 10.7                          | 179.5 ± 19.6                         | 177.8 ± 19.4                                      | 2W: F=2.05; P= 0.17<br>4W: F= 1.58; P= 0.22<br>Post:: F=2.06; P= 0.17    |
| TC<br>( mg /dL)            | 240.0 ±7.65                         | 233.9± 10.33                         | 238.7 ± 8.51                         | 238.0 ± 10.6                                      | 237.2±9.06                          | 227.3±8.42                           | 235.8 ± 9.08                         | 232.8 ± 7.2                                       | 2W: F=0.47; P= 0.50<br>4W: F=0.0; P= 1.0<br>Post:: F=0.13; P= 0.72       |
| HDL-Cho<br>(mg /dL)        | 48.5 ±1.81                          | 49.3±2.47                            | 49.5±2.00                            | 49.5±1.69                                         | 47.5±1.83                           | 49.8±1.78                            | 48.2±1.82                            | 49.2± 1.79                                        | 2W: F=5.22; P= 0.03*<br>4W: F= 1.99; P= 0.17<br>Post:: F=0.73; P= 0.40   |
| LDL-Cho<br>(mg /dL)        | 156.4±6.55                          | 157.5±6.99                           | 155.6±6.56                           | 155.6±8.37                                        | 157.2±7.44                          | 145.3±5.83                           | 146.2±6.55                           | 150.2±6.87                                        | 2W: F=2.95; P= 0.10<br>4W: F=1.45; P= 0.24<br>Post:: F=0.54; P= 0.47     |
| HbA1c<br>(%)               | 5.45±0.008                          | 5.50 ±0.09                           | 5.52±0.10                            | 5.40 ±0.09                                        | 5.41 ±0.09                          | 5.42 ±0.07                           | 5.45 ±0.07                           | 5.42 ±0.07                                        | 2W: F=0.18; P= 0.68<br>4W: F=0.0; P= 1.0<br>Post:: F=0.49; P= 0.49       |
| Na<br>(mEq /L)             | 141.6 ±0.40                         | 142.2±0.30                           | 141.4 ±0.37                          | 141.5±0.45                                        | 142.3 ±0.41                         | 142.1 ±0.21                          | 141.5 ±0.24                          | 141.8 ± 0.42                                      | 2W: F=0.65; P= 0.43<br>4W: F=0.33; P= 0.57<br>Post:: F=0.34 ; P= 0.57    |
| K<br>(mEq /L)              | 4.43±0.08                           | 4.50 ±0.09                           | 4.37 ±0.08                           | 4.52±0.11                                         | 4.27 ±0.09                          | 4.56 ±0.08                           | 4.64 ±0.12                           | 4.44 ±0.13                                        | 2W F=7.65; P= 0.011*;<br>4W: F= 8.54; P= 0.008*<br>Post:: F=0.9; P= 0.35 |
| Cl<br>(mEq /L)             | 101.5±0.43                          | 102.2 ±0.41                          | 102.7±0.54                           | 103.4±0.51                                        | 101.9 ±0.49                         | 103.0 ±0.48*                         | 103.7 ±0.52                          | 103.4 ±0.63                                       | 2W: F= 1.58; P= 0.22<br>4W: F=3.95; P= 0.05*<br>Post:: F= 0.61; P= 0.44  |
| Ca<br>(mg /dL)             | 9.38±0.09                           | 9.39 ±0.10                           | 9.40±0.10                            | 9.26±0.09                                         | 9.30 ±0.10                          | 9.38 ±0.08                           | 9.34 ±0.09                           | 9.26 ±0.09                                        | 2W: F=0.75; P= 0.40<br>4W: F=0.08; P= 0.78<br>Post:: F= 0.05; P= 0.83    |
| P<br>(mg /dL)              | 3.21 ±0.14                          | 3.07 ±0.16                           | 3.02 ±0.14                           | 3.25 ±0.15                                        | 3.11±0.16                           | 3.15 ±0.13                           | 3.32±0.18                            | 3.30 ±0.14                                        | 2W: F=1.43; P= 0.24<br>4W: F=6.02; P= 0.022*<br>Post: F= 0.95; P= 0.34;  |

**Table ST2.** Evaluation of activities of hepatic risk parameters to assess the possible changes in liver function and related safety aspects during amla supplementation among the healthy human subjects.

| Parameters                      | Placebo intake (mean± sem)          |                                      |                                      |                                                   | Amla intake (mean± sem)             |                                      |                                      |                                                   | ANCOVA<br>(Among<br>Groups)                                           |
|---------------------------------|-------------------------------------|--------------------------------------|--------------------------------------|---------------------------------------------------|-------------------------------------|--------------------------------------|--------------------------------------|---------------------------------------------------|-----------------------------------------------------------------------|
|                                 | Before<br>(W1, W2) or<br>(W10, W11) | 2 Weeks<br>(W3, W4) or<br>(W12, W13) | 4 Weeks<br>(W5, W6) or<br>(W14, W15) | Post (3 Weeks)<br>( W7,W9,W9) or<br>(W16,W17,W18) | Before<br>(W1, W2) or<br>(W10, W11) | 2 Weeks<br>(W3, W4) or<br>(W12, W13) | 4 Weeks<br>(W5, W6) or<br>(W14, W15) | Post (3 Weeks)<br>( W7,W9,W9) or<br>(W16,W17,W18) |                                                                       |
| Total Protein<br>(g/dL)         | 7.62 ±0.11                          | 7.55 ± 0.10                          | 7.50 ± 0.11                          | 7.43 ± 0.15                                       | 7.52± 0.09                          | 7.50 ± 0.08                          | 7.40 ± 0.05                          | 7.49 ± 0.11                                       | 2W: F=0.05; P= 0.83<br>4W: F=0.2; P= 0.66<br>Post: F=1.26; P= 0.27    |
|                                 |                                     | F=1.75; P= 0.21                      | F=3.10; P= 0.10                      | F=15.6; P= 0.002**                                |                                     | F=0.03; P= 0.87                      | F=3.61; P= 0.08                      | F=0.08; P= 0.78                                   |                                                                       |
| Albumin<br>(g /dL)              | 4.53±0.09                           | 4.51±0.08                            | 4.51 ±0.07                           | 4.45±0.07                                         | 4.49± 0.07                          | 4.45±0.06                            | 4.45 ± 0.07                          | 4.50 ± 0.09                                       | 2W: F=0.07; P= 0.79<br>4W: F=0.05; P= 0.83<br>Post: F=1.69; P= 0.21:  |
|                                 |                                     | F=0.68; P= 0.43                      | F=0.46; P= 0.51                      | F=6.29; P= 0.03*                                  |                                     | F=0.51; P= 0.49                      | F=0.38; P= 0.55                      | F=0.08; P= 0.78                                   |                                                                       |
| Albumin/Globulin<br>(A/G Ratio) | 1.48 ±0.05                          | 1.49± 0.05                           | 1.52 ± 0.05                          | 1.51 ±0.04                                        | 1.49±0.05                           | 1.48±0.04                            | 1.52 ± 0.05                          | 1.52 ± 0.06                                       | 2W: F=0.34; P= 0.57<br>4W: F=0.03; P= 0.86<br>Post: F=0.01; P= 0.92   |
|                                 |                                     | F=0.08; P= 0.78                      | F=3.21; P= 0.10                      | F=0.88; P= 0.37                                   |                                     | F=0.31; P= 0.59                      | F=0.99; P= 0.34                      | F=0.51; P= 0.49                                   |                                                                       |
| AST (GOT)<br>(IU /L /37° C)     | 21.5 ±1.04                          | 21.2±1.35                            | 22.5±1.42                            | 22.8±2.40                                         | 21.1±1.31                           | 21.3±1.31                            | 21.7±1.29                            | 21.7± 1.02                                        | 2W: F=0.14; P= 0.71<br>4W: F=0.0; P= 1.0<br>Post: F=0.0; P= 1.0       |
|                                 |                                     | F=0.2; P= 0.66                       | F=1.18; P= 0.30                      | F=0.58; P= 0.46                                   |                                     | F=0.03; P= 0.87                      | F=0.35; P= 0.57                      | F=0.81; P= 0.39                                   |                                                                       |
| ALT(GPT)m<br>( IU /L /37° C)    | 26.9±3.33                           | 26.5±4.27                            | 27.5±4.12                            | 27.7±3.64                                         | 29.5±3.76                           | 25.9±3.91                            | 28.0±3.10                            | 28.4±4.30                                         | 2W F=1.64; P= 0.21:<br>4W: F=0.38; P= 0.54<br>Post: F=0.53; P= 0.47   |
|                                 |                                     | F=0.02; P= 0.89                      | F=0.07; P= 0.80                      | F=0.37; P= 0.55                                   |                                     | F=8.06; P= 0.02*                     | F=0.47; P= 0.51                      | F=0.22; P= 0.65                                   |                                                                       |
| ALP<br>(IU /L /37° C)           | 257.2±17.3                          | 251.7 ± 16.8                         | 249.5 ± 16.7                         | 256.1 ± 17.9                                      | 245.2±15.3                          | 244.5±19.0                           | 242.1±17.6                           | 259.0±0.17.8                                      | 2W: F= 0.18; P= 0.68<br>4W: F=0.15 ; P= 0.70<br>Post: F=0.90; P= 0.35 |
|                                 |                                     | F=0.73; P= 0.41                      | F=1.33; P= 0.27                      | F=0.01; P=0.92                                    |                                     | F=0.01; P= 0.92                      | F=0.46; P= 0.51                      | F=2.5; P= 0.14                                    |                                                                       |
| γ-GPT<br>(IU /L /37° C)         | 45.3 ±5.61                          | 43.2 ±5.50                           | 43.3 ±5.63                           | 46.5 ± 8.58                                       | 42.0 ±5.45                          | 39.9±5.21                            | 40.4 ±5.18                           | 41.2±4.58                                         | 2W: F=0.01; P= 0.92<br>4W: F=0.0; P= 1.0<br>Post: F=0.12 ; P= 0.73    |
|                                 |                                     | F=0.84; P= 0.38                      | F=0.91; P= 0.36                      | F=0.04; P= 0.84                                   |                                     | F=0.48; P= 0.50                      | F=0.56; P= 0.47                      | F=0.11; P=0.75                                    |                                                                       |
| Creatinine<br>(mg /dL)          | 0.70±0.04                           | 0.69 ±0.04                           | 0.70±0.04                            | 0.70 ±0.04                                        | 0.70 ±0.04                          | 0.71 ±0.04                           | 0.72 ±0.04                           | 0.71 ±0.04                                        | 2W: F=0.18; P= 0.66<br>4W: F=0.09; P= 0.77<br>Post: F= 0.32; P= 0.58  |
|                                 |                                     | F=0.15; P= 0.71                      | F=0.0; P= 1.0                        | F=0.25; P= 0.63                                   |                                     | F=4.65; P= 0.05*                     | F=7.88; P= 0.02*                     | F=4.65; P= 0.05*                                  |                                                                       |
| Uric Acid<br>(mg /dL)           | 6.26±0.39                           | 6.41 ±0.47                           | 6.50±0.44                            | 6.10±0.33                                         | 6.14 ±0.36                          | 6.32 ±0.46                           | 6.25 ±0.39                           | 6.30 ±0.37                                        | 2W: F=0.04; P= 0.84<br>4W: F=0.16; P= 0.69<br>Post: F= 1.44; P= 0.24  |
|                                 |                                     | F=0.54; P= 0.47                      | F=1.0; P= 0.34                       | F=0.56; P= 0.47                                   |                                     | F=0.86; P= 0.37                      | F=0.59; P= 0.46                      | F=1.42; P= 0.26                                   |                                                                       |
| Urea-Nitrogen<br>(mg /dL)       | 13.6±0.74                           | 13.3 ±0.65                           | 14.2±0.76                            | 13.2 ±0.50                                        | 12.7 ±0.51                          | 13.4 ±0.1.0                          | 13.5 ±0.56                           | 14.3 ±0.87                                        | 2W: F=0.49; P= 0.49<br>4W: F=0.56; P= 0.46<br>Post: F= 3.12; P= 0.09  |
|                                 |                                     | F=0.18; P= 0.68                      | F=1.03; P= 0.33                      | F=0.25; P= 0.63                                   |                                     | F=0.67; P= 0.42                      | F=2.04; P= 0.18                      | F=3.77; P= 0.08                                   |                                                                       |
| Total Bilirubin<br>(mg /dL)     | 0.67±0.0621                         | 0.63 ±0.06                           | 0.64±0.07                            | 0.63 ±0.07                                        | 0.71 ±0.0.09                        | 0.55 ±0.07                           | 0.57 ±0.05                           | 0.62 ±0.06                                        | 2W: F=1.91; P= 0.18<br>4W: F=1.81; P= 0.19<br>Post: F= 0.51; P= 0.48  |
|                                 |                                     | F=0.37; P= 0.55                      | F=0.21; P= 0.65                      | F=0.19; P= 0.67                                   |                                     | F=5.58; P= 0.04*                     | F=2.85; P= 0.12                      | F=2.83; P= 0.12                                   |                                                                       |

**Table ST3.** Subjective qualitative urinalysis parameters assessment during amla supplementation among the healthy human subjects.

| Parameters                    | Placebo intake (mean± sem)          |                                      |                                      |                                                   | Amla intake (mean± sem)             |                                      |                                      |                                                   | ANCOVA<br>(Among Groups)                                            |
|-------------------------------|-------------------------------------|--------------------------------------|--------------------------------------|---------------------------------------------------|-------------------------------------|--------------------------------------|--------------------------------------|---------------------------------------------------|---------------------------------------------------------------------|
|                               | Before<br>(W1, W2) or<br>(W10, W11) | 2 Weeks<br>(W3, W4) or<br>(W12, W13) | 4 Weeks<br>(W5, W6) or<br>(W14, W15) | Post (3 Weeks)<br>( W7,W9,W9) or<br>(W16,W17,W18) | Before<br>(W1, W2) or<br>(W10, W11) | 2 Weeks<br>(W3, W4) or<br>(W12, W13) | 4 Weeks<br>(W5, W6) or<br>(W14, W15) | Post (3 Weeks)<br>( W7,W9,W9) or<br>(W16,W17,W18) |                                                                     |
| Specific Gravity (Value)      | 1.02 ±0.002                         | 1.02 ±0.002                          | 1.02 ±0.002                          | 1.02 ± 0.002                                      | 1.02 ±0.002                         | 1.02 ±0.002                          | 1.02 ±0.002                          | 1.02 ± 0.001                                      | 2W: F=0.99; P= 0.33<br>4W: F=0.49; P= 0.49<br>Post: F=0.19; P= 0.67 |
|                               |                                     | F=0.0; P= 1.0                        | F=0.0; P= 1.0                        | F=0.0; P= 1.0                                     |                                     | F=0.0; P= 1.0                        | F=0.0; P= 1.0                        | F=0.0; P= 1.0                                     |                                                                     |
| pH (Value)                    | 6.0±0.19                            | 6.12±0.30                            | 5.62 ±0.18                           | 6.0±0.27                                          | 5.92± 0.28                          | 6.0± 0.29                            | 5.54 ± 0.20                          | 5.69 ± 0.17                                       | 2W: F=0.0; P= 1.0<br>4W: F=1.08; P= 0.31<br>Post: F=0.51; P= 0.48   |
|                               |                                     | F=0.11; P= 0.75                      | F=2.08; P= 0.17                      | F=0.0; P= 1.0                                     |                                     | F=0.08; P= 0.78                      | F=1.99; P= 0.18                      | F=0.65; P= 0.44                                   |                                                                     |
| Urobilinogen                  | (±); N=13                           | (±); N=13                            | (±); N=13                            | (±); N=13                                         | (±); N=13                           | (±); N=13                            | (±); N=13                            | (±); N=13                                         |                                                                     |
| Protein                       | (-); N=13                           | (-); N=13                            | (-); N=13                            | (-); N=12,<br>(±); N=1                            | (-); N=12,<br>(±); N=1              | (-); N=13                            | (-); N=13                            | (-); N=13                                         |                                                                     |
| Sugar                         | (-); N=13                           | (-); N=13                            | (-); N=13                            | (-); N=13                                         | (-); N=13                           | (-); N=13                            | (-); N=13                            | (-); N=12,<br>(1+); N=1                           |                                                                     |
| Urinary Ketone Body           | (-); N=13                           | (-); N=13                            | (-); N=13                            | (-); N=13                                         | (-); N=13                           | (-); N=13                            | (-); N=12,<br>(2+); N=1              | (-); N=13                                         |                                                                     |
| Urinary Occult Blood reaction | (-); N=9,<br>(±); N=4               | (-); N=10,<br>(±); N=3               | (-); N=10,<br>(±); N=3               | (-); N=9,<br>(±); N=4                             | (-); N=12,<br>(±); N=1              | (-); N=11,<br>(±); N=1,<br>(1+); N=1 | (-); N=7,<br>(±); N=6                | (-); N=8,<br>(±); N=5                             |                                                                     |

**Table ST4.** The mapping of adverse events reported and confirmed acceptability of amla supplementation among the healthy human subjects.

| Subject numbers | Placebo intake                      |                                      |                                      |                                                   | Amla intake                         |                                      |                                      |                                                   |
|-----------------|-------------------------------------|--------------------------------------|--------------------------------------|---------------------------------------------------|-------------------------------------|--------------------------------------|--------------------------------------|---------------------------------------------------|
|                 | Before<br>(W1, W2) or<br>(W10, W11) | 2 Weeks<br>(W3, W4) or<br>(W12, W13) | 4 Weeks<br>(W5, W6) or<br>(W14, W15) | Post (3 Weeks)<br>( W7,W9,W9) or<br>(W16,W17,W18) | Before<br>(W1, W2) or<br>(W10, W11) | 2 Weeks<br>(W3, W4) or<br>(W12, W13) | 4 Weeks<br>(W5, W6) or<br>(W14, W15) | Post (3 Weeks)<br>( W7,W9,W9) or<br>(W16,W17,W18) |
| 1               | <b>Drop Out</b> (after screening)   |                                      |                                      |                                                   |                                     |                                      |                                      |                                                   |
| 2               | None                                | <b>Diarrhea Feelings</b><br>(W3, W4) | <b>Diarrhea Feelings</b><br>(W5, W6) | <b>Diarrhea Feelings</b><br>(W7,W9,W9)            | None                                | None                                 | None                                 | None                                              |
| 3               | None                                | None                                 | None                                 | None                                              | None                                | None                                 | None                                 | None                                              |
| 4               | None                                | None                                 | None                                 | None                                              | None                                | None                                 | None                                 | None                                              |
| 5               | None                                | None                                 | None                                 | None                                              | None                                | None                                 | None                                 | None                                              |
| 6               | None                                | None                                 | None                                 | None                                              | None                                | None                                 | None                                 | None                                              |
| 7               | None                                | <b>Cold</b><br>(W3, W4)              | <b>Slightly Cold</b><br>(W5,W6)      | None                                              | None                                | None                                 | None                                 | None                                              |
| 8               | None                                | None                                 | None                                 | None                                              | None                                | None                                 | None                                 | None                                              |
| 9               | None                                | None                                 | None                                 | None                                              | <b>Edema</b><br>(W1,W2)             | None                                 | None                                 | None                                              |
| 10              | None                                | None                                 | None                                 | <b>Drop Out</b> (after W6)                        |                                     |                                      |                                      |                                                   |
| 11              | None                                | None                                 | None                                 | None                                              | None                                | None                                 | None                                 | None                                              |
| 12              | None                                | <b>Loose stool</b><br>(W3, W4)       | None                                 | None                                              | None                                | None                                 | None                                 | None                                              |
| 13              | None                                | None                                 | None                                 | None                                              | None                                | None                                 | None                                 | None                                              |
| 14              | None                                | None                                 | None                                 | None                                              | None                                | None                                 | None                                 | None                                              |
| 15              | None                                | None                                 | <b>Constipation</b><br>(W5, W6)      | None                                              | None                                | None                                 | None                                 | None                                              |

**None**= No adverse event reported
